# Supplementary material
Source: publisher figshare collection journal article supplement (https://geolsoc.figshare.com/ndownloader/files/5421947)
Supplement: Supplementary file 1 [file 5421947]

SUP Table 2. Sources of new data,,,7 May 2012,
,,,,
Code,Area,Environment,Source,
N2,Canada,Marsh,"Tobin et al., 2005",
N3,"N Carolina, USA",Marsh,"Culver & Horton, 2005",
N4,"S Carolina, USA",Marsh,"Tobin et al., 2005",
N5,Portugal,Marsh,"Fatela et al., 2009",
N6,New Zealand,Marsh,"Southall et al., 2006",
N7,"Queensland, Australia",Mangal,"Berkeley et al., 2008",
N10,W Baltic,Mar. marine,"Polovodova et al., 2009",
N11,W Baltic,Mar. marine,"Sch�nfeld & Numberger, 2007",
N1,"Biscay, France",Mar. marine,"Morvan et al., 2006",
N12,S Italy,Mar. marine,"Frontalini et al., 2009",
N13,"Texas, USA",Mar. marine,"Buzas-Stephens & Buzas, 2005; Buzas-Stephen, Buzas & Elliott  2011",
N14,"California, USA",Mar. marine,"Lesen, 2005",
N15,Japan,Mar. marine,"Tsujimoto et al., 2006",
N19,Svalbard,Fjord,"Forwick et al., 2010",
N20,W Norway,Fjord,"Alve et al., 2011",
N25,"Biscay, France",Shelf,"Duchemin et al., 2005",
N26,"Biscay, France","Shelf, deep sea","Duchemin et al., 2007",
N27,S France,Shelf,"Mojtahid et al., 2009",
N28,Algeria,Shelf,"Milker et al., 2009",
N29,Adriatic Sea,Shelf,"Frontalini & Coccione, 2008",
N30,"Nevis, Caribbean",Shelf,"Wilson & Ramsook, 2007; Wilson, 2007",
N31,Nicaragua,Shelf,"Heinz et al., 2008",
N32,S China Sea,Shelf,"Szarek et al., 2006 ",
N33,Japan Sea,Shelf,"Pavlyuk et al., 2008",
N34,New Caledonia,Shelf,"Debenay & Payri, 2010",
N40,Okhotsk Sea,Deep sea,"Bubenshchikova et al., 2008",
N41,Barents Sea,Deep sea,"Ivanova et al., 2008",
N42,"Biscay, France",Deep sea,"Hess et al., 2005",
N43,"Biscay, France",Deep sea,"Hess & Jorissen, 2009",
N44,"Biscay, France",Deep sea,"Fontanier et al., 2006",
N45,"Biscay, France",Deep sea,"Mojtahid et al., 2010",
N46,"Biscay, France",Deep sea,"Barras et al., 2010",
N47,Portugal,Deep sea,"Koho et al., 2007",
N48,Portugal,Deep sea,"Griveaud et al., 2010",
N49,Portugal,Deep sea,"Nardelli et al., 2010",
N50,S France,Deep sea,"Fontanier et al., 2008a",
N51,S France,Deep sea,"Fontanier et al., 2008b",
N52,"N Carolina, USA",Deep sea,"Smart & Gooday, 2006",
N53,S China Sea,Deep sea,"Szarek et al, 2009",
N54,Pakistan,Deep sea,"Erbacher & Nelskamp, 2006",
N55,Arabian Sea,Deep sea,"Maas, 2000",
